# Supplementary material for: Stable isotopes in barnacles as a tool to understand green sea turtle ( Chelonia mydas ) regional movement patterns
Source: Copernicus journal article supplement (doi:10.5194/bg-12-7081-2015), 2015-12-08
Supplement: Supplementary file 1 [file bg-12-7081-2015-supplement.zip]

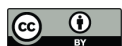

## *Supplement of*

# **Stable isotopes in barnacles as a tool to understand green sea turtle (*Chelonia mydas*) regional movement patterns**

**M. Detjen et al.**

*Correspondence to:* M. Detjen (md2986@caa.columbia.edu)

- bg-12-7081-2015-supplement-title-page.pdf
- Detjen et al\_Electronic Supplement\_Final.pdf
- Master Barnacle Final Upload.xlsx

The copyright of individual parts of the supplement might differ from the CC-BY 3.0 licence.
